# Supplementary material for: Engineering iridium-based metal organic frameworks towards electrocatalytic water oxidation
Source: Royal Society of Chemistry journal article supplement (doi:10.1039/c8dt00485d), 2018-01-01
Supplement: c8dt00485d1.pdf [file c8dt00485d1.pdf]

## **Supporting Information for**

### **Engineering Iridium-based Metal Organic Frameworks towards Electrocatalytic Water Oxidation**

Yuan Zhao,<sup>a,†</sup> Shengbo Zhang,<sup>a,†</sup> Mengyun Wang,<sup>a</sup> Jinyu Han,<sup>a</sup> Hua Wang,<sup>a</sup> Zhongcheng Li,<sup>\*b</sup> and  
Xiao Liu<sup>\*a,c</sup>

a. Key Laboratory for Green Chemical Technology of Ministry of Education, School of Chemical Engineering and Technology, Tianjin University, Tianjin 300072, China.

b. State Key Lab Base of Eco-chemical Engineering, College of Chemistry and Molecular Engineering, Qingdao University of Science and Technology, Qingdao 266042, China, E-mail: zhongchengli@qust.edu.cn

c. Key Laboratory of Pesticide & Chemical Biology of Ministry of Education, College of Chemistry, Central China Normal University, Wuhan 430079, China, E-mail: liuxiao71@tju.edu.cn

†These two authors contributed equally to this work.

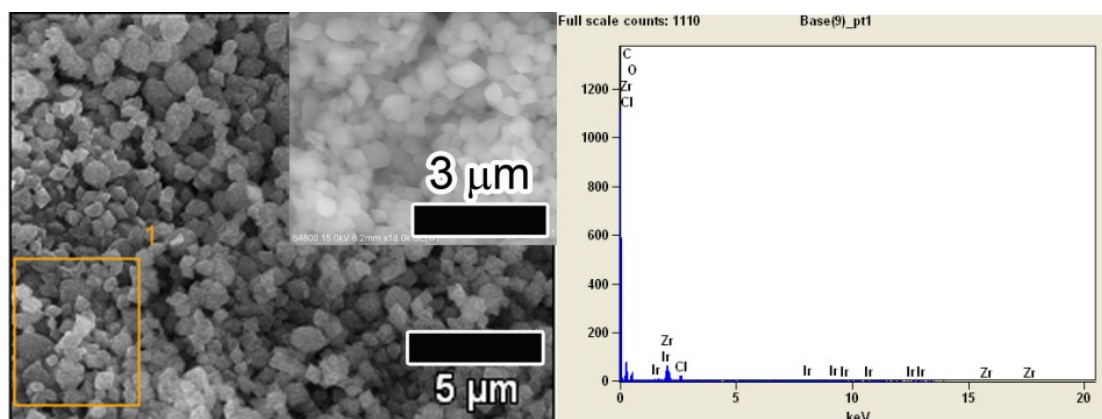

Figure S1. SEM image and EDX analysis of Ir in bpy-UiO<sub>30</sub>-Ir<sub>10</sub>.
